# Supplementary material for: Functional adaptations in the cecal and colonic metagenomes associated with the consumption of transglycosylated starch in a pig model
Source: PubMed Central journal article supplement (PMC6498482; doi:10.1186/s12866-019-1462-2), 2019-05-02
Supplement: 12866_2019_1462_MOESM1_ESM.pdf [file 12866_2019_1462_MOESM1_ESM.pdf]

1 **Functional adaptations in the cecal and colonic metagenomes associated with the**  
2 **consumption of transglycosylated starch in a pig model**

3

4 Barbara U. Metzler-Zebeli<sup>1</sup>, Monica A. Newman<sup>1</sup>, Dietmar Grill<sup>2</sup>, Qendrim Zebeli<sup>1</sup>

5

6 <sup>1</sup>Institute of Animal Nutrition and Functional Plant Compounds, Department for Farm Animals  
7 and Veterinary Public Health, University of Veterinary Medicine Vienna, 1210 Vienna, Austria

8 <sup>2</sup>Agrana Research & Innovation Center GmbH, 3430 Tulln, Austria;

9

10 Short title: Resistant starch and functional metagenome

11

12 Corresponding author: Barbara U. Metzler-Zebeli. E-mail: barbara.metzler@vetmeduni.ac.at

13

14 **Table S1** Selected KEGG orthology functions within the KEGG pathway ‘carbohydrate  
 15 metabolism’ in cecal samples being differently enriched in CON- and TGS-fed pigs

| KEGG orthology function                                                            | Mean* | log <sub>2</sub><br>fold<br>change | SE <sup>†</sup> | p value | q value <sup>‡</sup> |
|------------------------------------------------------------------------------------|-------|------------------------------------|-----------------|---------|----------------------|
| E3.2.1.85 lacG; 6-phospho-beta-galactosidase [EC:3.2.1.85]                         | 274   | 2.945                              | 0.622           | <0.001  | <0.001               |
| uxuB; fructuronate reductase [EC:1.1.1.57]                                         | 1015  | 2.576                              | 0.351           | <0.001  | <0.001               |
| araA; L-arabinose isomerase [EC:5.3.1.4]                                           | 1315  | 1.969                              | 0.348           | <0.001  | <0.001               |
| gatY-kbaY; tagatose 16-diphosphate aldolase GatY/KbaY [EC:4.1.2.40]                | 130   | 1.892                              | 0.350           | <0.001  | <0.001               |
| E3.1.2.1 ACH1; acetyl-CoA hydrolase [EC:3.1.2.1]                                   | 491   | 1.764                              | 0.324           | <0.001  | <0.001               |
| E3.2.1.86B bglA; 6-phospho-beta-glucosidase [EC:3.2.1.86]                          | 653   | 1.442                              | 0.355           | <0.001  | <0.001               |
| korD; 2-oxoglutarate ferredoxin oxidoreductase subunit delta [EC:1.2.7.3]          | 146   | 1.421                              | 0.273           | <0.001  | <0.001               |
| E3.2.1.22B galA rafA; alpha-galactosidase [EC:3.2.1.22]                            | 3262  | 1.393                              | 0.255           | <0.001  | <0.001               |
| fucK; L-fuculokinase [EC:2.7.1.51]                                                 | 213   | 1.348                              | 0.294           | <0.001  | <0.001               |
| E4.1.1.70; glutaconyl-CoA decarboxylase [EC:4.1.1.70]                              | 504   | 1.321                              | 0.228           | <0.001  | <0.001               |
| E3.2.1.122 glvA; maltose-6'-phosphate glucosidase [EC:3.2.1.122]                   | 107   | 1.311                              | 0.303           | <0.001  | <0.001               |
| E3.2.1.1A; alpha-amylase [EC:3.2.1.1]                                              | 1281  | 1.256                              | 0.244           | <0.001  | <0.001               |
| E2.7.1.4 scrK; fructokinase [EC:2.7.1.4]                                           | 1882  | 1.245                              | 0.231           | <0.001  | <0.001               |
| nagB GNPDA; glucosamine-6-phosphate deaminase [EC:3.5.99.6]                        | 2370  | 1.233                              | 0.225           | <0.001  | <0.001               |
| sdhC; succinate dehydrogenase cytochrome b556 subunit                              | 468   | 1.222                              | 0.264           | <0.001  | <0.001               |
| murQ; N-acetylmuramic acid 6-phosphate etherase [EC:4.2.1.126]                     | 595   | 1.195                              | 0.203           | <0.001  | <0.001               |
| korG; 2-oxoglutarate ferredoxin oxidoreductase subunit gamma [EC:1.2.7.3]          | 623   | 1.112                              | 0.263           | <0.001  | <0.001               |
| lacZ; beta-galactosidase [EC:3.2.1.23]                                             | 6502  | 1.047                              | 0.235           | <0.001  | <0.001               |
| sdhB; succinate dehydrogenase iron-sulfur subunit [EC:1.3.99.1]                    | 967   | 1.028                              | 0.227           | <0.001  | <0.001               |
| uxuA; mannonate dehydratase [EC:4.2.1.8]                                           | 1029  | 1.006                              | 0.228           | <0.001  | <0.001               |
| uxaC; glucuronate isomerase [EC:5.3.1.12]                                          | 1147  | 0.959                              | 0.222           | <0.001  | <0.001               |
| GPI pgi; glucose-6-phosphate isomerase [EC:5.3.1.9]                                | 3088  | -0.859                             | 0.201           | <0.001  | <0.001               |
| PRPS prsA; ribose-phosphate pyrophosphokinase [EC:2.7.6.1]                         | 1899  | -1.018                             | 0.199           | <0.001  | <0.001               |
| TPI tpiA; triosephosphate isomerase (TIM) [EC:5.3.1.1]                             | 1394  | -1.186                             | 0.270           | <0.001  | <0.001               |
| glmM; phosphoglucosamine mutase [EC:5.4.2.10]                                      | 1309  | -1.272                             | 0.289           | <0.001  | <0.001               |
| xylA; xylose isomerase [EC:5.3.1.5]                                                | 233   | -1.374                             | 0.314           | <0.001  | <0.001               |
| glgC; glucose-1-phosphate adenyltransferase [EC:2.7.7.27]                          | 1697  | -1.567                             | 0.223           | <0.001  | <0.001               |
| accC; acetyl-CoA carboxylase biotin carboxylase subunit [EC:6.4.1.2 6.3.4.14]      | 913   | -1.655                             | 0.372           | <0.001  | <0.001               |
| E1.4.7.1; glutamate synthase (ferredoxin) [EC:1.4.7.1]                             | 942   | -1.996                             | 0.419           | <0.001  | <0.001               |
| accB bccP; acetyl-CoA carboxylase biotin carboxyl carrier protein                  | 158   | -2.032                             | 0.400           | <0.001  | <0.001               |
| ldhA; D-lactate dehydrogenase [EC:1.1.1.28]                                        | 615   | -2.193                             | 0.421           | <0.001  | <0.001               |
| E3.2.1.1 amyA malS; alpha-amylase [EC:3.2.1.1]                                     | 1038  | -2.257                             | 0.542           | <0.001  | <0.001               |
| rpiA; ribose 5-phosphate isomerase A [EC:5.3.1.6]                                  | 261   | -2.832                             | 0.639           | <0.001  | <0.001               |
| purU; formyltetrahydrofolate deformylase [EC:3.5.1.10]                             | 195   | -3.128                             | 0.563           | <0.001  | <0.001               |
| pta; phosphate acetyltransferase [EC:2.3.1.8]                                      | 258   | -3.240                             | 0.644           | <0.001  | <0.001               |
| acnB; aconitate hydratase 2 / 2-methylisocitrate dehydratase [EC:4.2.1.3 4.2.1.99] | 472   | -3.434                             | 0.625           | <0.001  | <0.001               |
| ppgK; polyphosphate glucokinase [EC:2.7.1.63]                                      | 115   | -3.943                             | 0.888           | <0.001  | <0.001               |
| xynB; xylan 14-beta-xylosidase [EC:3.2.1.37]                                       | 236   | 1.803                              | 0.463           | <0.001  | 0.001                |

|                                                                                       |      |        |       |        |       |
|---------------------------------------------------------------------------------------|------|--------|-------|--------|-------|
| treC; trehalose-6-phosphate hydrolase [EC:3.2.1.93]                                   | 236  | 1.078  | 0.282 | <0.001 | 0.001 |
| fbp3; fructose-16-bisphosphatase III [EC:3.1.3.11]                                    | 1281 | 0.763  | 0.201 | <0.001 | 0.001 |
| E5.1.3.3 galM; aldose 1-epimerase [EC:5.1.3.3]                                        | 1481 | 0.742  | 0.199 | <0.001 | 0.001 |
| E5.3.1.8 manA; mannose-6-phosphate isomerase [EC:5.3.1.8]                             | 1059 | 0.690  | 0.189 | <0.001 | 0.001 |
| E2.4.1.21 glgA; starch synthase [EC:2.4.1.21]                                         | 1490 | -0.590 | 0.161 | <0.001 | 0.001 |
| E2.4.1.1 glgP PYG; starch phosphorylase [EC:2.4.1.1]                                  | 4517 | -0.647 | 0.172 | <0.001 | 0.001 |
| pfkA PFK; 6-phosphofructokinase 1 [EC:2.7.1.11]                                       | 2368 | -0.906 | 0.242 | <0.001 | 0.001 |
| E2.5.1.56 neuB; N-acetylneuraminic acid synthase [EC:2.5.1.56]                        | 707  | -1.100 | 0.300 | <0.001 | 0.001 |
| IDH3; isocitrate dehydrogenase (NAD+) [EC:1.1.1.41]                                   | 179  | -1.451 | 0.395 | <0.001 | 0.001 |
| accA; acetyl-CoA carboxylase carboxyl transferase subunit alpha [EC:6.4.1.2]          | 524  | -2.003 | 0.517 | <0.001 | 0.001 |
| E2.7.1.17; xylulokinase [EC:2.7.1.17]                                                 | 1305 | 0.991  | 0.275 | <0.001 | 0.002 |
| accD; acetyl-CoA carboxylase carboxyl transferase subunit beta [EC:6.4.1.2]           | 449  | -1.849 | 0.511 | <0.001 | 0.002 |
| manC cpsB; mannose-1-phosphate guanylyltransferase [EC:2.7.7.13]                      | 1845 | 0.990  | 0.293 | 0.001  | 0.003 |
| araD; L-ribulose-5-phosphate 4-epimerase [EC:5.1.3.4]                                 | 407  | 0.893  | 0.260 | 0.001  | 0.003 |
| FBA fbaA; fructose-bisphosphate aldolase class II [EC:4.1.2.13]                       | 2405 | -0.715 | 0.208 | 0.001  | 0.003 |
| mtlD; mannitol-1-phosphate 5-dehydrogenase [EC:1.1.1.17]                              | 170  | 1.487  | 0.449 | 0.001  | 0.004 |
| UGP2 galU galF; UTP--glucose-1-phosphate uridylyltransferase [EC:2.7.7.9]             | 731  | -0.784 | 0.235 | 0.001  | 0.004 |
| E2.2.1.1 tktA tktB; transketolase [EC:2.2.1.1]                                        | 4254 | -0.631 | 0.200 | 0.002  | 0.007 |
| E4.2.1.47 gmd; GDPmannose 46-dehydratase [EC:4.2.1.47]                                | 1773 | 0.643  | 0.214 | 0.003  | 0.011 |
| CS gltA; citrate synthase [EC:2.3.3.1]                                                | 2121 | -0.493 | 0.165 | 0.003  | 0.011 |
| E6.4.1.1B pycB; pyruvate carboxylase subunit B [EC:6.4.1.1]                           | 1294 | 0.425  | 0.144 | 0.003  | 0.012 |
| korB; 2-oxoglutarate ferredoxin oxidoreductase subunit beta [EC:1.2.7.3]              | 1244 | 0.477  | 0.164 | 0.004  | 0.014 |
| deoC DERA; deoxyribose-phosphate aldolase [EC:4.1.2.4]                                | 1639 | 0.504  | 0.175 | 0.004  | 0.015 |
| glpX; fructose-16-bisphosphatase II [EC:3.1.3.11]                                     | 328  | -1.372 | 0.485 | 0.005  | 0.017 |
| E3.1.1.11; pectinesterase [EC:3.1.1.11]                                               | 326  | 1.078  | 0.384 | 0.005  | 0.018 |
| murA; UDP-N-acetylglucosamine 1-carboxyvinyltransferase [EC:2.5.1.7]                  | 3145 | -0.848 | 0.303 | 0.005  | 0.018 |
| glcD; glycolate oxidase [EC:1.1.3.15]                                                 | 534  | 0.843  | 0.305 | 0.006  | 0.019 |
| PC pyc; pyruvate carboxylase [EC:6.4.1.1]                                             | 370  | 0.460  | 0.166 | 0.006  | 0.019 |
| E3.2.1.52 nagZ; beta-N-acetylhexosaminidase [EC:3.2.1.52]                             | 442  | -0.935 | 0.342 | 0.006  | 0.021 |
| RENBP; N-acylglucosamine 2-epimerase [EC:5.1.3.8]                                     | 489  | 0.566  | 0.211 | 0.007  | 0.024 |
| E2.7.1.90 pfk; pyrophosphate--fructose-6-phosphate 1-phosphotransferase [EC:2.7.1.90] | 1705 | 0.393  | 0.149 | 0.008  | 0.026 |
| mdh; malate dehydrogenase [EC:1.1.1.37]                                               | 1298 | 0.683  | 0.265 | 0.010  | 0.031 |
| wbpO; UDP-N-acetyl-D-galactosamine dehydrogenase [EC:1.1.1.-]                         | 849  | 0.649  | 0.252 | 0.010  | 0.031 |
| E3.2.1.55 abfA; alpha-N-arabinofuranosidase [EC:3.2.1.55]                             | 823  | 0.836  | 0.330 | 0.011  | 0.033 |
| pps ppsA; pyruvate water dikinase [EC:2.7.9.2]                                        | 301  | 0.482  | 0.189 | 0.011  | 0.033 |
| rpe RPE; ribulose-phosphate 3-epimerase [EC:5.1.3.1]                                  | 1417 | -0.401 | 0.160 | 0.012  | 0.035 |
| ackA; acetate kinase [EC:2.7.2.1]                                                     | 2673 | -0.928 | 0.373 | 0.013  | 0.036 |
| lacC; tagatose 6-phosphate kinase [EC:2.7.1.144]                                      | 126  | 0.864  | 0.350 | 0.014  | 0.038 |
| E1.1.1.271 fcl; GDP-L-fucose synthase [EC:1.1.1.271]                                  | 1464 | 0.519  | 0.217 | 0.017  | 0.046 |
| korA; 2-oxoglutarate ferredoxin oxidoreductase subunit alpha [EC:1.2.7.3]             | 1830 | 0.390  | 0.164 | 0.018  | 0.048 |
| E3.2.1.10; oligo-16-glucosidase [EC:3.2.1.10]                                         | 365  | 0.523  | 0.226 | 0.021  | 0.055 |
| bcsA; cellulose synthase (UDP-forming) [EC:2.4.1.12]                                  | 90   | -1.517 | 0.659 | 0.021  | 0.056 |
| kdgK; 2-dehydro-3-deoxygluconokinase [EC:2.7.1.45]                                    | 1398 | 0.433  | 0.193 | 0.025  | 0.064 |

|                                                                                                                                       |      |        |       |       |       |
|---------------------------------------------------------------------------------------------------------------------------------------|------|--------|-------|-------|-------|
| wecC; UDP-N-acetyl-D-mannosaminuronic acid dehydrogenase<br>[EC:1.1.1.336]                                                            | 145  | 1.074  | 0.485 | 0.027 | 0.069 |
| glmU; bifunctional UDP-N-acetylglucosamine pyrophosphorylase /<br>Glucosamine-1-phosphate N-acetyltransferase [EC:2.7.7.23 2.3.1.157] | 779  | -0.646 | 0.296 | 0.029 | 0.074 |
| E1.1.1.44 PGD gnd; 6-phosphogluconate dehydrogenase [EC:1.1.1.44]                                                                     | 102  | 0.981  | 0.458 | 0.032 | 0.080 |
| npdA; NAD-dependent deacetylase [EC:3.5.1.-]                                                                                          | 1262 | -0.368 | 0.172 | 0.032 | 0.080 |
| E2.7.2.7 buk; butyrate kinase [EC:2.7.2.7]                                                                                            | 424  | -0.729 | 0.350 | 0.037 | 0.091 |

16 \*Normalized reads (hit counts). Only the most abundant functions (>0.01% of all reads) that were altered by the

17 dietary starch source are presented ( $n = 8$  per diet).

18 † Standard error of the  $\log_2$ fold change.

19 ‡ False discovery rate (Benjamini-Hochberg) corrected  $p$  value.

20 **Table S2** Selected KEGG orthology functions within the KEGG pathway ‘carbohydrate  
 21 metabolism’ in colonic samples being differently enriched in CON- and TGS-fed pigs

| KEGG orthology function                                                          | Mean* | log <sub>2</sub><br>fold<br>change | SE <sup>†</sup> | p value | q value <sup>‡</sup> |
|----------------------------------------------------------------------------------|-------|------------------------------------|-----------------|---------|----------------------|
| E3.2.1.85 lacG; 6-phospho-beta-galactosidase [EC:3.2.1.85]                       | 483   | 5.117                              | 0.371           | <0.001  | <0.001               |
| xynB; xylan 14-beta-xylosidase [EC:3.2.1.37]                                     | 221   | 2.411                              | 0.374           | <0.001  | <0.001               |
| gatY-kbaY; tagatose 16-diphosphate aldolase GatY/KbaY [EC:4.1.2.40]              | 286   | 2.386                              | 0.334           | <0.001  | <0.001               |
| E3.2.1.86B bgIA; 6-phospho-beta-glucosidase [EC:3.2.1.86]                        | 1097  | 2.316                              | 0.331           | <0.001  | <0.001               |
| E3.1.2.1 ACH1; acetyl-CoA hydrolase [EC:3.1.2.1]                                 | 544   | 2.243                              | 0.167           | <0.001  | <0.001               |
| ulaG; L-ascorbate 6-phosphate lactonase [EC:3.1.1.-]                             | 147   | 2.139                              | 0.379           | <0.001  | <0.001               |
| uxuB; fructuronate reductase [EC:1.1.1.57]                                       | 741   | 1.956                              | 0.232           | <0.001  | <0.001               |
| treC; trehalose-6-phosphate hydrolase [EC:3.2.1.93]                              | 430   | 1.939                              | 0.297           | <0.001  | <0.001               |
| araA; L-arabinose isomerase [EC:5.3.1.4]                                         | 1206  | 1.882                              | 0.218           | <0.001  | <0.001               |
| ppc; phosphoenolpyruvate carboxylase [EC:4.1.1.31]                               | 322   | 1.877                              | 0.468           | 0.000   | <0.001               |
| E4.1.1.70; glutaconyl-CoA decarboxylase [EC:4.1.1.70]                            | 750   | 1.876                              | 0.247           | <0.001  | <0.001               |
| sdhC; succinate dehydrogenase cytochrome b556 subunit                            | 407   | 1.691                              | 0.156           | <0.001  | <0.001               |
| glcD; glycolate oxidase [EC:1.1.3.15]                                            | 792   | 1.617                              | 0.239           | <0.001  | <0.001               |
| murQ; N-acetylmuramic acid 6-phosphate etherase [EC:4.2.1.126]                   | 861   | 1.483                              | 0.203           | <0.001  | <0.001               |
| E3.2.1.122 glvA; maltose-6'-phosphate glucosidase [EC:3.2.1.122]                 | 163   | 1.456                              | 0.274           | <0.001  | <0.001               |
| E3.2.1.22B galA rafA; alpha-galactosidase [EC:3.2.1.22]                          | 3509  | 1.332                              | 0.149           | <0.001  | <0.001               |
| E3.2.1.1A; alpha-amylase [EC:3.2.1.1]                                            | 1049  | 1.260                              | 0.158           | <0.001  | <0.001               |
| manC cpsB; mannose-1-phosphate guanylyltransferase [EC:2.7.7.13]                 | 1297  | 1.227                              | 0.161           | <0.001  | <0.001               |
| sdhB; succinate dehydrogenase iron-sulfur subunit [EC:1.3.99.1]                  | 800   | 1.219                              | 0.152           | <0.001  | <0.001               |
| lacZ; beta-galactosidase [EC:3.2.1.23]                                           | 5813  | 1.165                              | 0.134           | <0.001  | <0.001               |
| korD; 2-oxoglutarate ferredoxin oxidoreductase subunit delta [EC:1.2.7.3]        | 160   | 1.151                              | 0.161           | <0.001  | <0.001               |
| araD; L-ribulose-5-phosphate 4-epimerase [EC:5.1.3.4]                            | 476   | 1.109                              | 0.215           | <0.001  | <0.001               |
| E4.2.1.47 gmd; GDPmannose 46-dehydratase [EC:4.2.1.47]                           | 1599  | 1.063                              | 0.173           | <0.001  | <0.001               |
| pps ppsA; pyruvate water dikinase [EC:2.7.9.2]                                   | 500   | 1.047                              | 0.213           | <0.001  | <0.001               |
| E2.7.1.4 scrK; fructokinase [EC:2.7.1.4]                                         | 1799  | 1.032                              | 0.144           | <0.001  | <0.001               |
| nagB GNPDA; glucosamine-6-phosphate deaminase [EC:3.5.99.6]                      | 2393  | 1.010                              | 0.154           | <0.001  | <0.001               |
| mdh; malate dehydrogenase [EC:1.1.1.37]                                          | 1159  | 0.870                              | 0.188           | <0.001  | <0.001               |
| korG; 2-oxoglutarate ferredoxin oxidoreductase subunit gamma [EC:1.2.7.3]        | 610   | 0.821                              | 0.150           | <0.001  | <0.001               |
| E5.3.1.8 manA; mannose-6-phosphate isomerase [EC:5.3.1.8]                        | 1025  | 0.792                              | 0.143           | <0.001  | <0.001               |
| fbp3; fructose-16-bisphosphatase III [EC:3.1.3.11]                               | 1421  | 0.774                              | 0.121           | <0.001  | <0.001               |
| E3.5.1.25 nagA AMDHD2; N-acetylglucosamine-6-phosphate deacetylase [EC:3.5.1.25] | 876   | 0.770                              | 0.186           | <0.001  | <0.001               |
| E1.1.1.271 fcl; GDP-L-fucose synthase [EC:1.1.1.271]                             | 1226  | 0.702                              | 0.180           | <0.001  | <0.001               |
| deoC DERA; deoxyribose-phosphate aldolase [EC:4.1.2.4]                           | 1573  | 0.607                              | 0.158           | <0.001  | <0.001               |
| korA; 2-oxoglutarate ferredoxin oxidoreductase subunit alpha [EC:1.2.7.3]        | 2253  | 0.596                              | 0.151           | <0.001  | <0.001               |
| E2.2.1.1 tktA tktB; transketolase [EC:2.2.1.1]                                   | 5033  | -0.563                             | 0.135           | <0.001  | <0.001               |
| E2.4.1.1 glgP PYG; starch phosphorylase [EC:2.4.1.1]                             | 5262  | -0.651                             | 0.133           | <0.001  | <0.001               |
| PGK pgk; phosphoglycerate kinase [EC:2.7.2.3]                                    | 3715  | -0.689                             | 0.139           | <0.001  | <0.001               |
| FBA fbaA; fructose-bisphosphate aldolase class II [EC:4.1.2.13]                  | 2598  | -0.724                             | 0.111           | <0.001  | <0.001               |

|                                                                                       |      |        |       |        |        |
|---------------------------------------------------------------------------------------|------|--------|-------|--------|--------|
| ppdK; pyruvate orthophosphate dikinase [EC:2.7.9.1]                                   | 5292 | -0.816 | 0.203 | <0.001 | <0.001 |
| PRPS prsA; ribose-phosphate pyrophosphokinase [EC:2.7.6.1]                            | 2313 | -0.849 | 0.150 | <0.001 | <0.001 |
| E1.4.7.1; glutamate synthase (ferredoxin) [EC:1.4.7.1]                                | 782  | -0.895 | 0.197 | <0.001 | <0.001 |
| rhaD; rhamnulose-1-phosphate aldolase [EC:4.1.2.19]                                   | 401  | -0.916 | 0.236 | <0.001 | <0.001 |
| glgC; glucose-1-phosphate adenylyltransferase [EC:2.7.7.27]                           | 2477 | -1.017 | 0.177 | <0.001 | <0.001 |
| E3.2.1.52 nagZ; beta-N-acetylhexosaminidase [EC:3.2.1.52]                             | 421  | -1.035 | 0.268 | <0.001 | <0.001 |
| glmM; phosphoglucosamine mutase [EC:5.4.2.10]                                         | 1981 | -1.055 | 0.183 | <0.001 | <0.001 |
| GPI pgi; glucose-6-phosphate isomerase [EC:5.3.1.9]                                   | 3330 | -1.073 | 0.138 | <0.001 | <0.001 |
| pfkA PFK; 6-phosphofructokinase 1 [EC:2.7.1.11]                                       | 3010 | -1.105 | 0.192 | <0.001 | <0.001 |
| murA; UDP-N-acetylglucosamine 1-carboxyvinyltransferase [EC:2.5.1.7]                  | 3588 | -1.257 | 0.169 | <0.001 | <0.001 |
| ldhA; D-lactate dehydrogenase [EC:1.1.1.28]                                           | 636  | -1.290 | 0.270 | <0.001 | <0.001 |
| TPI tpiA; triosephosphate isomerase (TIM) [EC:5.3.1.1]                                | 1811 | -1.321 | 0.151 | <0.001 | <0.001 |
| ptb; phosphate butyryltransferase [EC:2.3.1.19]                                       | 165  | -1.329 | 0.330 | <0.001 | <0.001 |
| xylA; xylose isomerase [EC:5.3.1.5]                                                   | 209  | -1.409 | 0.317 | <0.001 | <0.001 |
| ackA; acetate kinase [EC:2.7.2.1]                                                     | 2697 | -1.411 | 0.142 | <0.001 | <0.001 |
| IDH3; isocitrate dehydrogenase (NAD+) [EC:1.1.1.41]                                   | 211  | -1.428 | 0.252 | <0.001 | <0.001 |
| porA; pyruvate ferredoxin oxidoreductase alpha subunit [EC:1.2.7.1]                   | 336  | -1.677 | 0.407 | 0.000  | <0.001 |
| porB; pyruvate ferredoxin oxidoreductase beta subunit [EC:1.2.7.1]                    | 274  | -1.678 | 0.414 | <0.001 | <0.001 |
| E2.7.2.7 buk; butyrate kinase [EC:2.7.2.7]                                            | 425  | -1.752 | 0.191 | <0.001 | <0.001 |
| E1.1.1.60 garR; 2-hydroxy-3-oxopropionate reductase [EC:1.1.1.60]                     | 141  | -1.790 | 0.335 | <0.001 | <0.001 |
| accC; acetyl-CoA carboxylase biotin carboxylase subunit [EC:6.4.1.2 6.3.4.14]         | 1077 | -1.853 | 0.227 | <0.001 | <0.001 |
| melA; alpha-galactosidase [EC:3.2.1.22]                                               | 184  | -1.978 | 0.295 | <0.001 | <0.001 |
| accB bccP; acetyl-CoA carboxylase biotin carboxyl carrier protein                     | 204  | -2.061 | 0.270 | <0.001 | <0.001 |
| accD; acetyl-CoA carboxylase carboxyl transferase subunit beta [EC:6.4.1.2]           | 518  | -2.212 | 0.313 | <0.001 | <0.001 |
| accA; acetyl-CoA carboxylase carboxyl transferase subunit alpha [EC:6.4.1.2]          | 659  | -2.522 | 0.261 | <0.001 | <0.001 |
| purU; formyltetrahydrofolate deformylase [EC:3.5.1.10]                                | 168  | -2.553 | 0.537 | <0.001 | <0.001 |
| E3.2.1.1 amyA malS; alpha-amylase [EC:3.2.1.1]                                        | 1222 | -2.832 | 0.335 | <0.001 | <0.001 |
| rpiA; ribose 5-phosphate isomerase A [EC:5.3.1.6]                                     | 183  | -3.345 | 0.492 | <0.001 | <0.001 |
| pta; phosphate acetyltransferase [EC:2.3.1.8]                                         | 225  | -3.624 | 0.569 | <0.001 | <0.001 |
| lacC; tagatose 6-phosphate kinase [EC:2.7.1.144]                                      | 218  | 1.556  | 0.447 | 0.001  | 0.001  |
| rfbH; CDP-6-deoxy-D-xylo-4-hexulose-3-dehydrase                                       | 414  | 1.272  | 0.352 | <0.001 | 0.001  |
| E2.7.1.17; xylulokinase [EC:2.7.1.17]                                                 | 1082 | 0.655  | 0.186 | <0.001 | 0.001  |
| rpe RPE; ribulose-phosphate 3-epimerase [EC:5.1.3.1]                                  | 1577 | -0.520 | 0.141 | <0.001 | 0.001  |
| treS; maltose alpha-D-glucosyltransferase/ alpha-amylase [EC:5.4.99.16 3.2.1.1]       | 506  | -1.396 | 0.380 | <0.001 | 0.001  |
| E3.2.1.10; oligo-16-glucosidase [EC:3.2.1.10]                                         | 737  | 0.887  | 0.258 | 0.001  | 0.002  |
| E5.1.3.3 galM; aldose 1-epimerase [EC:5.1.3.3]                                        | 1392 | 0.645  | 0.189 | 0.001  | 0.002  |
| E2.7.1.90 pfk; pyrophosphate--fructose-6-phosphate 1-phosphotransferase [EC:2.7.1.90] | 1278 | 0.581  | 0.170 | 0.001  | 0.002  |
| npdA; NAD-dependent deacetylase [EC:3.5.1.-]                                          | 1265 | -0.608 | 0.179 | 0.001  | 0.002  |
| galE GALE; UDP-glucose 4-epimerase [EC:5.1.3.2]                                       | 4069 | -0.533 | 0.164 | 0.001  | 0.003  |
| acnB; aconitate hydratase 2 / 2-methylisocitrate dehydratase [EC:4.2.1.3 4.2.1.99]    | 447  | -2.096 | 0.638 | 0.001  | 0.003  |
| mtlD; mannitol-1-phosphate 5-dehydrogenase [EC:1.1.1.17]                              | 300  | 1.443  | 0.467 | 0.002  | 0.005  |
| E3.1.1.11; pectinesterase [EC:3.1.1.11]                                               | 181  | 0.982  | 0.318 | 0.002  | 0.005  |
| bgaB lacA; beta-galactosidase [EC:3.2.1.23]                                           | 654  | 0.546  | 0.182 | 0.003  | 0.007  |

|                                                                                          |      |        |       |       |       |
|------------------------------------------------------------------------------------------|------|--------|-------|-------|-------|
| korB; 2-oxoglutarate ferredoxin oxidoreductase subunit beta [EC:1.2.7.3]                 | 1530 | 0.450  | 0.153 | 0.003 | 0.008 |
| wecC; UDP-N-acetyl-D-mannosaminuronic acid dehydrogenase [EC:1.1.1.336]                  | 198  | 1.495  | 0.520 | 0.004 | 0.010 |
| CS gltA; citrate synthase [EC:2.3.3.1]                                                   | 2201 | -0.471 | 0.165 | 0.004 | 0.010 |
| glgB; 14-alpha-glucan branching enzyme [EC:2.4.1.18]                                     | 4168 | -0.486 | 0.169 | 0.004 | 0.010 |
| sucC; succinyl-CoA synthetase beta subunit [EC:6.2.1.5]                                  | 773  | 1.545  | 0.547 | 0.005 | 0.011 |
| sucD; succinyl-CoA synthetase alpha subunit [EC:6.2.1.5]                                 | 569  | 1.528  | 0.540 | 0.005 | 0.011 |
| ACSS acs; acetyl-CoA synthetase [EC:6.2.1.1]                                             | 2020 | -0.772 | 0.273 | 0.005 | 0.011 |
| E2.4.1.-; [EC:2.4.1.-]                                                                   | 432  | 0.649  | 0.236 | 0.006 | 0.013 |
| E2.2.1.2 talA talB; transaldolase [EC:2.2.1.2]                                           | 316  | 0.564  | 0.207 | 0.006 | 0.014 |
| murB; UDP-N-acetylmuramate dehydrogenase [EC:1.1.1.158]                                  | 1325 | -0.374 | 0.139 | 0.007 | 0.015 |
| E2.3.1.54 pfID; formate C-acetyltransferase [EC:2.3.1.54]                                | 4467 | 0.430  | 0.167 | 0.010 | 0.020 |
| E4.2.1.2A fumA fumB; fumarate hydratase class I [EC:4.2.1.2]                             | 1590 | 0.443  | 0.175 | 0.011 | 0.024 |
| E1.1.1.40 maeB; malate dehydrogenase (oxaloacetate-decarboxylating)(NADP+) [EC:1.1.1.40] | 1619 | 0.562  | 0.224 | 0.012 | 0.025 |
| E5.3.1.17 kduI; 4-deoxy-L-threo-5-hexosulose-uronate ketol-isomerase [EC:5.3.1.17]       | 372  | 0.382  | 0.153 | 0.012 | 0.025 |
| fucK; L-fuculokinase [EC:2.7.1.51]                                                       | 144  | 0.808  | 0.325 | 0.013 | 0.026 |
| E3.2.1.55 abfA; alpha-N-arabinofuranosidase [EC:3.2.1.55]                                | 751  | 0.677  | 0.278 | 0.015 | 0.029 |
| UGP2 galU galF; UTP--glucose-1-phosphate uridylyltransferase [EC:2.7.7.9]                | 1083 | -0.536 | 0.232 | 0.021 | 0.038 |
| rhaA; L-rhamnose isomerase [EC:5.3.1.14]                                                 | 782  | -0.606 | 0.263 | 0.021 | 0.039 |
| E2.4.1.21 glgA; starch synthase [EC:2.4.1.21]                                            | 2000 | -0.322 | 0.145 | 0.026 | 0.046 |
| uxaC; glucuronate isomerase [EC:5.3.1.12]                                                | 1132 | 0.333  | 0.152 | 0.028 | 0.050 |
| rbsK RBKS; ribokinase [EC:2.7.1.15]                                                      | 252  | -0.549 | 0.263 | 0.037 | 0.062 |
| E4.2.1.2AB fumB; fumarate hydratase subunit beta [EC:4.2.1.2]                            | 649  | -0.695 | 0.335 | 0.038 | 0.064 |
| E3.2.1.20 malZ; alpha-glucosidase [EC:3.2.1.20]                                          | 2328 | -0.518 | 0.271 | 0.056 | 0.089 |
| E3.2.1.26 sacA; beta-fructofuranosidase [EC:3.2.1.26]                                    | 460  | 0.555  | 0.292 | 0.057 | 0.091 |
| RENBP; N-acylglucosamine 2-epimerase [EC:5.1.3.8]                                        | 540  | 0.510  | 0.275 | 0.064 | 0.100 |
| UGDH ugd; UDPglucose 6-dehydrogenase [EC:1.1.1.22]                                       | 2852 | 0.234  | 0.126 | 0.064 | 0.100 |

22 \*Normalized reads (hit counts). Only the most abundant functions (>0.01% of all reads) that were altered by the

23 dietary starch source are presented ( $n = 8$  per diet).

24 † Standard error of the  $\log_2$ fold change.

25 ‡ False discovery rate (Benjamini-Hochberg) corrected  $p$  value.

26 **Table S3** Taxonomic identity of *lacZ* genes being differently enriched in cecal and colonic  
 27 samples of CON- and TGS-fed pigs

| Taxonomic identity     | Mean* | log <sub>2</sub> fold change | SE <sup>†</sup> | <i>p</i> value | <i>q</i> value <sup>‡</sup> |
|------------------------|-------|------------------------------|-----------------|----------------|-----------------------------|
| Cecum                  |       |                              |                 |                |                             |
| <i>Bacteroides</i>     | 2030  | 0.409                        | 0.196           | 0.037          | 0.097                       |
| <i>Prevotella</i>      | 1921  | 1.465                        | 0.424           | 0.001          | 0.007                       |
| <i>Parabacteroides</i> | 387   | -0.772                       | 0.278           | 0.005          | 0.029                       |
| <i>Flavobacterium</i>  | 92    | -1.021                       | 0.451           | 0.024          | 0.076                       |
| <i>Paludibacter</i>    | 70    | -1.924                       | 0.611           | 0.002          | 0.012                       |
| <i>Akkermansia</i>     | 62    | -1.348                       | 0.420           | 0.001          | 0.010                       |
| <i>Eubacterium</i>     | 44    | 0.835                        | 0.337           | 0.013          | 0.054                       |
| Colon                  |       |                              |                 |                |                             |
| <i>Prevotella</i>      | 1577  | 1.897                        | 0.316           | <0.001         | <0.001                      |
| <i>Bacteroides</i>     | 1556  | 0.529                        | 0.215           | 0.014          | 0.021                       |
| <i>Parabacteroides</i> | 423   | -1.055                       | 0.316           | 0.001          | 0.002                       |
| <i>Flavobacterium</i>  | 98    | -1.115                       | 0.332           | 0.001          | 0.002                       |
| <i>Bacillus</i>        | 80    | 1.065                        | 0.234           | <0.001         | <0.001                      |
| <i>Eubacterium</i>     | 80    | 1.536                        | 0.275           | <0.001         | <0.001                      |
| <i>Paludibacter</i>    | 66    | -3.248                       | 0.361           | <0.001         | <0.001                      |
| <i>Lactobacillus</i>   | 52    | 0.475                        | 0.258           | 0.066          | 0.089                       |
| <i>Butyrivibrio</i>    | 44    | 2.377                        | 0.330           | <0.001         | <0.001                      |

28 \*Normalized reads (hit counts). Only the most abundant genera (>0.01% of all reads) that were altered by the dietary  
 29 starch source are presented (*n* = 8 per diet and gut site).

30 <sup>†</sup> Standard error of the log<sub>2</sub>fold change.

31 <sup>‡</sup> False discovery rate (Benjamini-Hochberg) corrected *p* value.

32



33 **Table S4** Taxonomic identity of *galA* genes being differently enriched in cecal and colonic  
 34 samples of CON- and TGS-fed pigs

| Taxonomic identity     | Mean* | log <sub>2</sub> fold change | SE <sup>†</sup> | <i>p</i> value | <i>q</i> value <sup>‡</sup> |
|------------------------|-------|------------------------------|-----------------|----------------|-----------------------------|
| Cecum                  |       |                              |                 |                |                             |
| <i>Clostridium</i>     | 111   | -0.984                       | 0.382           | 0.010          | 0.051                       |
| <i>Ruminococcus</i>    | 20    | -1.876                       | 0.743           | 0.012          | 0.051                       |
| <i>Caulobacter</i>     | 17    | 1.599                        | 0.493           | 0.001          | 0.017                       |
| <i>Vibrio</i>          | 14    | -3.823                       | 1.457           | 0.009          | 0.051                       |
| <i>Butyrivibrio</i>    | 13    | -1.534                       | 0.594           | 0.010          | 0.051                       |
| Colon                  |       |                              |                 |                |                             |
| <i>Parabacteroides</i> | 749   | 1.208                        | 0.306           | <0.001         | <0.001                      |
| <i>Bacteroides</i>     | 719   | 1.915                        | 0.294           | <0.001         | <0.001                      |
| <i>Prevotella</i>      | 429   | 1.944                        | 0.362           | <0.001         | <0.001                      |
| <i>Lactobacillus</i>   | 127   | 0.731                        | 0.270           | 0.007          | 0.017                       |
| <i>Paenibacillus</i>   | 103   | 0.651                        | 0.316           | 0.040          | 0.076                       |
| <i>Ruminococcus</i>    | 38    | -1.650                       | 0.329           | <0.001         | <0.001                      |
| <i>Caulobacter</i>     | 27    | 2.444                        | 0.438           | <0.001         | <0.001                      |
| <i>Aeromonas</i>       | 24    | -5.661                       | 1.353           | <0.001         | <0.001                      |
| <i>Treponema</i>       | 22    | -1.386                       | 0.492           | 0.005          | 0.013                       |

35 \*Normalized reads (hit counts). Only the most abundant genera (>0.01% of all reads) that were altered by the dietary  
 36 starch source are presented (*n* = 8 per diet and gut site).

37 <sup>†</sup> Standard error of the log<sub>2</sub>fold change.

38 <sup>‡</sup> False discovery rate (Benjamini-Hochberg) corrected *p* value.

39

40 **Table S5** Taxonomic identity of *amyA* genes being differently enriched in cecal and colonic  
 41 samples of CON- and TGS-fed pigs

| Taxonomic identity   | Mean* | log <sub>2</sub> fold change | SE <sup>†</sup> | <i>p</i> value | <i>q</i> value <sup>‡</sup> |
|----------------------|-------|------------------------------|-----------------|----------------|-----------------------------|
| Cecum                |       |                              |                 |                |                             |
| <i>Bacillus</i>      | 168   | -3.290                       | 0.962           | 0.001          | 0.002                       |
| <i>Aeromonas</i>     | 157   | -8.451                       | 1.283           | <0.001         | <0.001                      |
| <i>Streptococcus</i> | 146   | -3.608                       | 0.902           | <0.001         | <0.001                      |
| <i>Butyrivibrio</i>  | 107   | -4.806                       | 1.248           | <0.001         | 0.001                       |
| <i>Clostridium</i>   | 103   | -4.964                       | 0.939           | <0.001         | <0.001                      |
| <i>Vibrio</i>        | 68    | -3.292                       | 1.012           | 0.001          | 0.004                       |
| <i>Enterobacter</i>  | 22    | -5.400                       | 1.142           | <0.001         | <0.001                      |
| <i>Lactococcus</i>   | 21    | -3.512                       | 1.253           | 0.005          | 0.014                       |
| <i>Pseudomonas</i>   | 17    | -6.164                       | 1.534           | <0.001         | <0.001                      |
| <i>Klebsiella</i>    | 13    | -4.192                       | 1.402           | 0.003          | 0.008                       |
| Colon                |       |                              |                 |                |                             |
| <i>Bacillus</i>      | 102   | -1.616                       | 0.397           | <0.001         | <0.001                      |
| <i>Streptococcus</i> | 101   | -1.538                       | 0.456           | 0.001          | 0.003                       |
| <i>Lactobacillus</i> | 68    | 1.384                        | 0.423           | 0.001          | 0.003                       |
| <i>Aeromonas</i>     | 66    | -8.154                       | 1.161           | <0.001         | <0.001                      |
| <i>Clostridium</i>   | 59    | -1.443                       | 0.530           | 0.006          | 0.014                       |
| <i>Butyrivibrio</i>  | 39    | -5.427                       | 0.758           | <0.001         | <0.001                      |
| <i>Vibrio</i>        | 37    | -1.685                       | 0.518           | 0.001          | 0.003                       |
| <i>Eubacterium</i>   | 14    | 2.626                        | 0.501           | <0.001         | <0.001                      |
| <i>Enterobacter</i>  | 13    | -3.918                       | 1.079           | <0.001         | 0.001                       |

42 \*Normalized reads (hit counts). Only the most abundant genera (>0.01% of all reads) that were altered by the dietary  
 43 starch source are presented (*n* = 8 per diet and gut site).

44 <sup>†</sup> Standard error of the log<sub>2</sub>fold change.

45 <sup>‡</sup> False discovery rate (Benjamini-Hochberg) corrected *p* value.

46 **Table S6** Taxonomic identity of *araA* genes being differently enriched in cecal and colonic  
 47 samples of CON- and TGS-fed pigs

| Taxonomic identity   | Mean* | log <sub>2</sub> fold change | SE <sup>†</sup> | <i>p</i> value | <i>q</i> value <sup>‡</sup> |
|----------------------|-------|------------------------------|-----------------|----------------|-----------------------------|
| Cecum                |       |                              |                 |                |                             |
| <i>Prevotella</i>    | 289   | 0.989                        | 0.526           | 0.060          | 0.097                       |
| <i>Lactobacillus</i> | 119   | 3.178                        | 0.626           | 0.000          | 0.000                       |
| <i>Clostridium</i>   | 63    | -2.485                       | 0.705           | 0.000          | 0.004                       |
| <i>Bacillus</i>      | 29    | -2.242                       | 0.651           | 0.001          | 0.004                       |
| <i>Escherichia</i>   | 21    | -1.715                       | 0.819           | 0.036          | 0.071                       |
| <i>Leuconostoc</i>   | 15    | 1.846                        | 0.562           | 0.001          | 0.006                       |
| Colon                |       |                              |                 |                |                             |
| <i>Lactobacillus</i> | 207   | 4.166                        | 0.537           | 0.000          | 0.000                       |
| <i>Prevotella</i>    | 162   | 0.619                        | 0.313           | 0.048          | 0.067                       |
| <i>Clostridium</i>   | 116   | -3.373                       | 0.493           | 0.000          | 0.000                       |
| <i>Bacillus</i>      | 53    | -2.438                       | 0.486           | 0.000          | 0.000                       |
| <i>Leuconostoc</i>   | 24    | 1.770                        | 0.607           | 0.004          | 0.006                       |
| <i>Escherichia</i>   | 21    | -3.595                       | 0.660           | 0.000          | 0.000                       |
| <i>Vibrio</i>        | 8     | -7.342                       | 1.056           | 0.000          | 0.000                       |
| <i>Paenibacillus</i> | 6     | -6.910                       | 1.037           | 0.000          | 0.000                       |

48 \*Normalized reads (hit counts). Only the most abundant genera (>0.01% of all reads) that were altered by the dietary  
 49 starch source are presented (*n* = 8 per diet and gut site).

50 <sup>†</sup> Standard error of the log<sub>2</sub>fold change.

51 <sup>‡</sup> False discovery rate (Benjamini-Hochberg) corrected *p* value.

52

53 **Table S7** Taxonomic identity of genes predicted to encode proteins within the KEGG pathway  
 54 ‘lipopolysaccharide biosynthesis’ differently enriched in cecal and colonic samples of CON- and  
 55 TGS-fed pigs

| Taxonomic identity     | Mean* | log <sub>2</sub> fold change | SE <sup>†</sup> | p value | q value <sup>‡</sup> |
|------------------------|-------|------------------------------|-----------------|---------|----------------------|
| Cecum                  |       |                              |                 |         |                      |
| <i>Prevotella</i>      | 4167  | 2.356                        | 0.459           | <0.001  | <0.001               |
| <i>Acidaminococcus</i> | 519   | 1.446                        | 0.313           | <0.001  | <0.001               |
| <i>Veillonella</i>     | 328   | 2.491                        | 0.359           | <0.001  | <0.001               |
| <i>Vibrio</i>          | 95    | -3.297                       | 0.711           | <0.001  | <0.001               |
| <i>Aeromonas</i>       | 94    | -3.931                       | 0.794           | <0.001  | <0.001               |
| <i>Porphyromonas</i>   | 92    | -1.640                       | 0.732           | 0.025   | 0.075                |
| <i>Tolumonas</i>       | 85    | -5.527                       | 0.876           | <0.001  | <0.001               |
| <i>Haemophilus</i>     | 72    | -1.674                       | 0.580           | 0.004   | 0.020                |
| <i>Akkermansia</i>     | 70    | -4.645                       | 0.905           | <0.001  | <0.001               |
| <i>Desulfovibrio</i>   | 50    | 1.073                        | 0.457           | 0.019   | 0.061                |
| <i>Pseudomonas</i>     | 40    | -1.813                       | 0.520           | <0.001  | 0.004                |
| <i>Aliivibrio</i>      | 40    | -2.150                       | 0.800           | 0.007   | 0.029                |
| <i>Paludibacter</i>    | 37    | -1.799                       | 0.724           | 0.013   | 0.047                |
| Colon                  |       |                              |                 |         |                      |
| <i>Prevotella</i>      | 2848  | 2.523                        | 0.282           | <0.001  | <0.001               |
| <i>Bacteroides</i>     | 1174  | 0.686                        | 0.260           | 0.008   | 0.019                |
| <i>Acidaminococcus</i> | 660   | 1.596                        | 0.329           | <0.001  | <0.001               |
| <i>Veillonella</i>     | 450   | 2.889                        | 0.267           | <0.001  | <0.001               |
| <i>Parabacteroides</i> | 356   | -1.771                       | 0.461           | <0.001  | 0.001                |
| <i>Vibrio</i>          | 125   | -3.588                       | 0.768           | <0.001  | <0.001               |
| <i>Aeromonas</i>       | 124   | -5.885                       | 0.959           | <0.001  | <0.001               |
| <i>Tolumonas</i>       | 119   | -6.515                       | 0.927           | <0.001  | <0.001               |
| <i>Shigella</i>        | 116   | -1.904                       | 0.699           | 0.006   | 0.015                |
| <i>Helicobacter</i>    | 109   | 1.502                        | 0.438           | 0.001   | 0.002                |
| <i>Porphyromonas</i>   | 90    | -2.777                       | 0.436           | <0.001  | <0.001               |
| <i>Haemophilus</i>     | 72    | -2.333                       | 0.664           | <0.001  | 0.002                |
| <i>Wolinella</i>       | 70    | 2.263                        | 0.576           | <0.001  | <0.001               |
| <i>Desulfovibrio</i>   | 66    | 1.301                        | 0.371           | <0.001  | 0.002                |
| <i>Flavobacterium</i>  | 57    | -0.961                       | 0.479           | 0.045   | 0.081                |
| <i>Pseudomonas</i>     | 52    | -2.414                       | 0.510           | <0.001  | <0.001               |
| <i>Aliivibrio</i>      | 42    | -2.836                       | 0.899           | 0.002   | 0.005                |
| <i>Klebsiella</i>      | 37    | -2.148                       | 0.821           | 0.009   | 0.020                |
| <i>Paludibacter</i>    | 34    | -3.288                       | 0.538           | <0.001  | <0.001               |
| <i>Akkermansia</i>     | 29    | -3.564                       | 0.582           | <0.001  | <0.001               |

- 56 \*Normalized reads (hit counts). Only the most abundant genera (>0.01% of all reads) that were altered by the dietary  
57 starch source are presented ( $n = 8$  per diet and gut site).
- 58 † Standard error of the  $\log_2$ fold change.
- 59 ‡ False discovery rate (Benjamini-Hochberg) corrected  $p$  value.

60 **Table S8** Taxonomic identity of genes predicted to encode proteins within the KEGG pathway  
 61 ‘flagellar assembly’ differently enriched in cecal and colonic samples of CON- and TGS-fed pigs

| Taxonomic identity       | Mean* | log <sub>2</sub> fold change | SE <sup>†</sup> | <i>p</i> value | <i>q</i> value <sup>‡</sup> |
|--------------------------|-------|------------------------------|-----------------|----------------|-----------------------------|
| Cecum                    |       |                              |                 |                |                             |
| <i>Treponema</i>         | 2220  | -2.200                       | 1.074           | 0.041          | 0.091                       |
| <i>Aeromonas</i>         | 1102  | -6.425                       | 0.956           | <0.001         | <0.001                      |
| <i>Spirochaeta</i>       | 480   | -2.275                       | 1.120           | 0.042          | 0.093                       |
| <i>Pseudoalteromonas</i> | 160   | -4.973                       | 1.020           | <0.001         | <0.001                      |
| <i>Pseudomonas</i>       | 133   | -2.772                       | 0.634           | <0.001         | <0.001                      |
| <i>Eubacterium</i>       | 115   | -2.610                       | 0.574           | <0.001         | <0.001                      |
| <i>Brachyspira</i>       | 93    | -2.686                       | 0.866           | 0.002          | 0.007                       |
| <i>Vibrio</i>            | 89    | -5.062                       | 0.989           | <0.001         | <0.001                      |
| <i>Alteromonas</i>       | 83    | -6.161                       | 1.088           | <0.001         | <0.001                      |
| Colon                    |       |                              |                 |                |                             |
| <i>Aeromonas</i>         | 1491  | -8.233                       | 0.989           | <0.001         | <0.001                      |
| <i>Treponema</i>         | 713   | -5.440                       | 0.642           | <0.001         | <0.001                      |
| <i>Escherichia</i>       | 568   | -3.274                       | 0.909           | <0.001         | <0.001                      |
| <i>Vibrio</i>            | 313   | -7.295                       | 1.110           | <0.001         | <0.001                      |
| <i>Clostridium</i>       | 300   | 1.417                        | 0.296           | <0.001         | <0.001                      |
| <i>Campylobacter</i>     | 176   | -2.074                       | 0.405           | <0.001         | <0.001                      |
| <i>Spirochaeta</i>       | 172   | -5.504                       | 0.623           | <0.001         | <0.001                      |
| <i>Pseudoalteromonas</i> | 169   | -5.518                       | 0.996           | <0.001         | <0.001                      |
| <i>Shigella</i>          | 92    | -3.295                       | 1.003           | 0.001          | 0.003                       |
| <i>Pseudomonas</i>       | 91    | -2.541                       | 0.685           | <0.001         | 0.001                       |
| <i>Heliobacterium</i>    | 90    | 2.535                        | 0.552           | <0.001         | <0.001                      |
| <i>Eubacterium</i>       | 83    | -2.377                       | 0.370           | <0.001         | <0.001                      |
| <i>Alteromonas</i>       | 68    | -7.979                       | 1.227           | <0.001         | <0.001                      |

62 \*Normalized reads (hit counts). Only the most abundant genera (>0.01% of all reads) that were altered by the dietary  
 63 starch source are presented (*n* = 8 per diet and gut site).

64 <sup>†</sup> Standard error of the log<sub>2</sub>fold change.

65 <sup>‡</sup> False discovery rate (Benjamini-Hochberg) corrected *p* value.

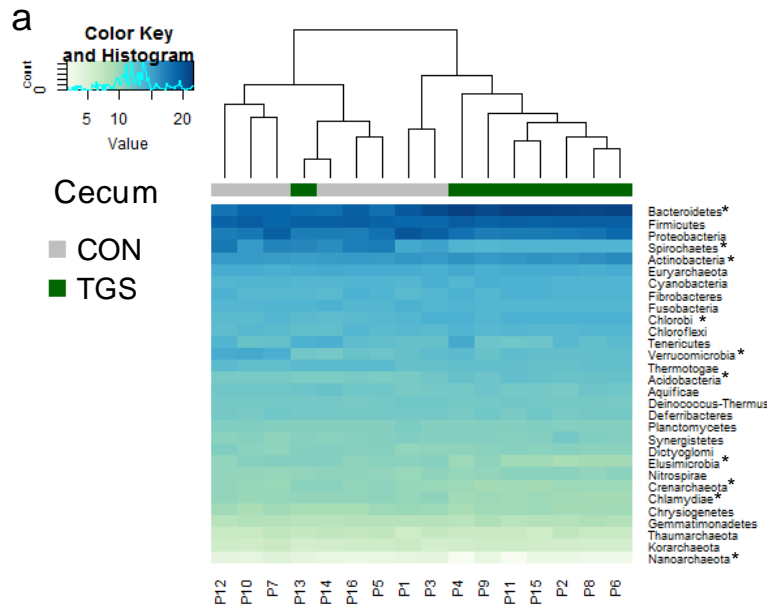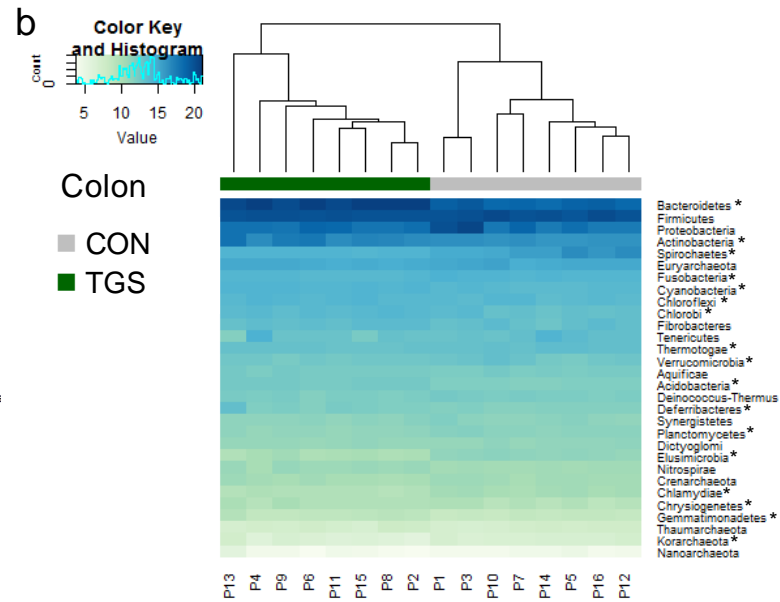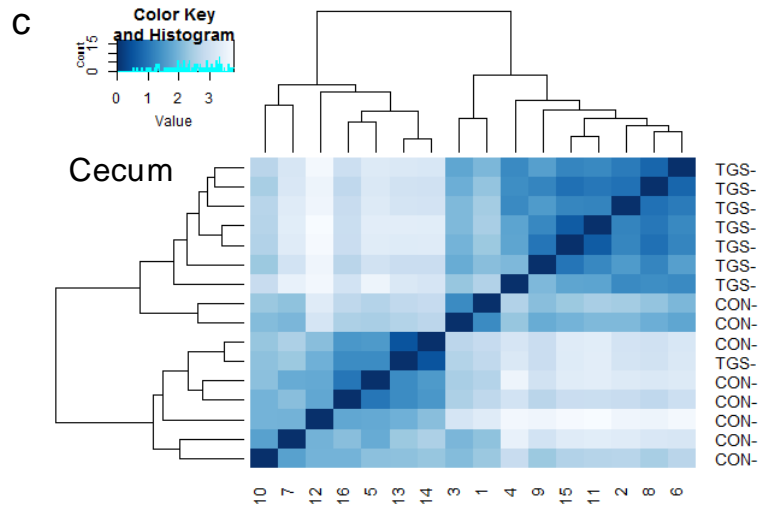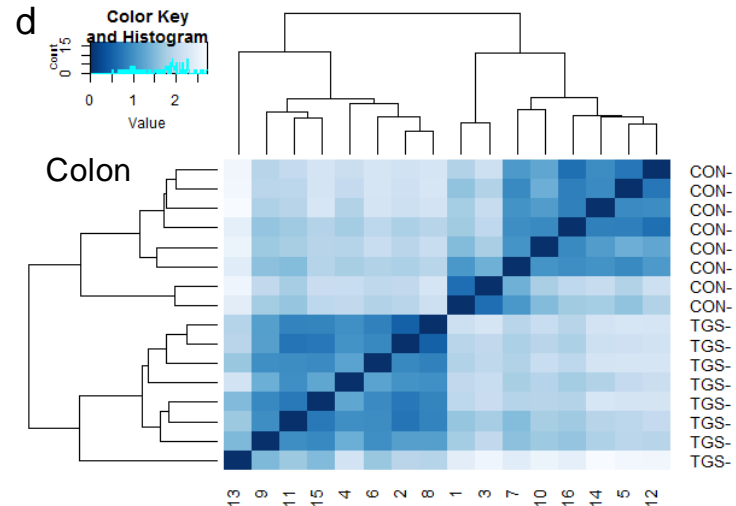

67 **Figure S1** Heatmaps of abundances (hit counts) and distance matrices (Euclidian distance) of cecal and colonic samples at phylum level  
68 in control starch (CON)- and transglycosylated starch (TGS)-fed pigs (P1-P16). a phyla abundances in cecum; b phyla abundances in  
69 colon; c distance matrix of cecal samples; and d distance matrix of colonic samples. Hit counts were normalized with DESeq2-size  
70 factors. Abundance change significance between dietary starches is indicated by \* ( $p < 0.05$  (false discovery rate,  $q < 0.10$ )).



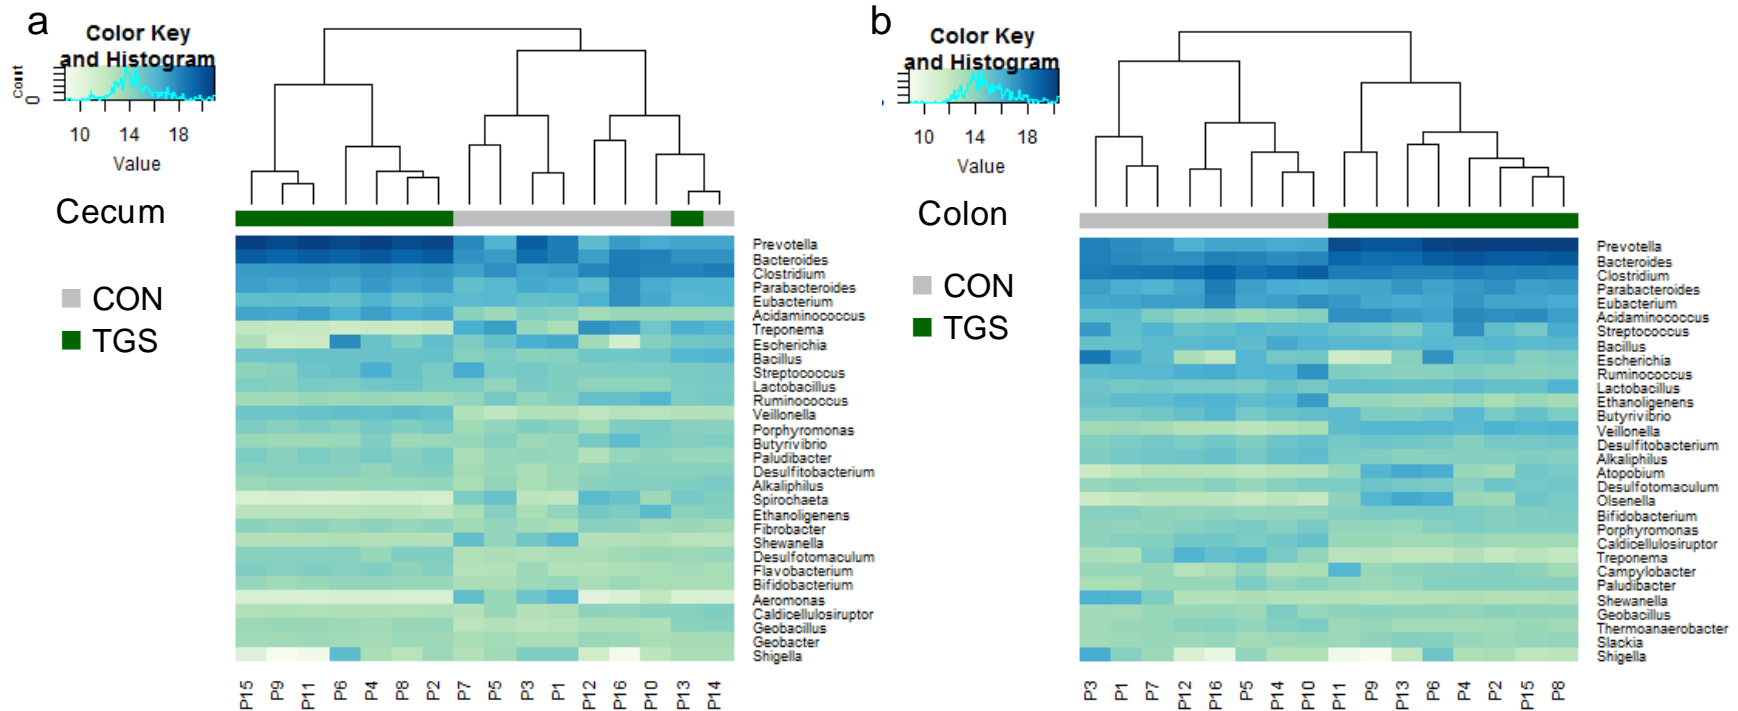

71

72 **Figure S2** Heatmaps of differently abundant genera (hit counts) in of cecal (a) and colonic samples (b) from control starch (CON)- and  
 73 transglycosylated starch (TGS)-fed pigs (P1-P16). Only the 30 most abundant genera that were differently affected by the dietary starch  
 74 source are presented. Hit counts were normalized with DESeq2-size factors. Abundance change significance between dietary starches is  $p$   
 75  $< 0.05$  (false discovery rate,  $q < 0.10$ )).  
 76
